# Supplementary material
Source: PubMed Central journal article supplement (PMC5957548)
Supplement: NIHMS936264-supplement-Supp_1.pdf [file NIHMS936264-supplement-Supp_1.pdf]

| Supplementary Table 1 - QconCAT constructs |         |                    |        |                                             |          |
|--------------------------------------------|---------|--------------------|--------|---------------------------------------------|----------|
| Peptide Sequence                           | QconCAT | PeptideSequence    | MW     | Protein                                     | GENE     |
| VVGLSTLPEIYEK                              | pQ1     | VVGLSTLPEIYEK      |        | Alcohol Dehydrogenase                       | ADH      |
| LVNEVTEFAK                                 | pQ1     | LVNEVTEFAK         | 69367  | Albumin                                     | ALB      |
| SASDLTWDNLK                                | pQ1     | SASDLTWDNLK        | 77064  | Serotransferrin                             | TF       |
| SVLGQLGITK                                 | pQ1     | SVLGQLGITK         | 46737  | Alpha-1-Anti-trypsin                        | SERPINA1 |
| YWGVASFLQK                                 | pQ1     | YWGVASFLQK         | 23010  | Retinol-binding protein 4                   | RBP4     |
| TGLQEVEVK                                  | pQ1     | TGLQEVEVK          | 187148 | Complement C3                               | C3       |
| SPELQAEAK                                  | pQ1     | SPELQAEAK          | 11175  | ApolipoproteinA-II                          | APOA2    |
| ATEHLSTLSEK                                | pQ1     | ATEHLSTLSEK        | 30778  | ApolipoproteinA-I                           | APOA1    |
| AADDTWEPFASGK                              | pQ1     | AADDTWEPFASGK      | 15887  | Transthyretin                               | TTR      |
| NEDSLVVFQTDK                               | pQ1     | NEDSLVVFQTDK       | 163291 | alpha-2-macroglobulin                       | A2M      |
| TEDTIFLR                                   | pQ1     | TEDTIFLR           | 23512  | Alpha-1-acid glycoprotein1                  | ORM1     |
| VGYYVSGWGR                                 | pQ1     | VGYYVSGWGR         | 45205  | Haptoglobin                                 | HP       |
| NFPSPVDAAFR                                | pQ1     | NFPSPVDAAFR        | 51676  | Hemopexin                                   | HPX      |
| VGDTLNLNLR                                 | pQ1     | VGDTLNLNLR         | 192751 | Complement C4 B beta chain                  | C4B      |
| DNENVVNEYSSELEK                            | pQ1     | DNENVVNEYSSELEK    | 55928  | Fibrinogen beta chain                       | FGB      |
| GSESGIFTNTK                                | pQ1     | GSESGIFTNTK        | 94973  | Fibrinogen alpha chain                      | FGA      |
| EQLSLLDR                                   | pQ1     | EQLSLLDR           | 47651  | Alpha-1-antichymotrypsin                    | SERPINA3 |
| GLIDEVNQDFTNR                              | pQ1     | GLIDEVNQDFTNR      | 94973  | Fibrinogen alpha chain                      | FGA      |
| TYLPAVDEK                                  | pQ1     | TYLPAVDEK          | 11284  | ApolipoproteinC-II                          | APOC2    |
| YEASILTHDSSIR                              | pQ1     | YEASILTHDSSIR      | 51512  | Fibrinogen gamma chain                      | FGG      |
| YLQEIYNSNNQK                               | pQ1     | YLQEIYNSNNQK       | 51512  | Fibrinogen gamma chain                      | FGG      |
| GAYPLSIEPIGVR                              | pQ1     | GAYPLSIEPIGVR      | 122205 | Ceruloplasmin                               | CP       |
| GWVTDGFSSLK                                | pQ1     | GWVTDGFSSLK        | 10852  | ApolipoproteinC-III                         | APOC3    |
| NILTSNNIDVK                                | pQ1     | NILTSNNIDVK        | 21276  | Apolipoprotein D                            | APOD     |
| VAEGTQVLELPFK                              | pQ1     | VAEGTQVLELPFK      | 52602  | Antithrombin-III                            | SERPINC1 |
| SPDVINGSPISQK                              | pQ1     | SPDVINGSPISQK      | 139096 | Complement factor H                         | CFH      |
| ATVVYQGER                                  | pQ1     | ATVVYQGER          | 38298  | Apolipoprotein H (B2-glycoprotein1)         | APOH     |
| TEVIPPLIENR                                | pQ1     | TEVIPPLIENR        | 114874 | ApolipoproteinB-100                         | APOB     |
| FSVVYAK                                    | pQ1     | FSVVYAK            | 39325  | Alpha-2-HS-glycoprotein                     | AHSG     |
| EWFSETFQK                                  | pQ1     | EWFSETFQK          | 9332   | ApolipoproteinC-I                           | APOC1    |
| THLPEVFLSK                                 | pQ1     | THLPEVFLSK         | 52964  | Vitamin D-binding protein                   | GC       |
| TVGSDTFYSFK                                | pQ1     | TVGSDTFYSFK        | 71957  | Kininogen-1                                 | KNG1     |
| NQVSLTCLVK                                 | pQ1     | NQVSLTCLVK         | 36106  | Ig gamma-(1-4) chain C region (IGHG1)       | IGHG1-4  |
| TVAAPSVFIFPPSDEQLK                         | pQ1     | TVAAPSVFIFPPSDEQLK | 11609  | Ig kappa constant                           | IGKC     |
| EDGGGWYYNR                                 | pQ1     | EDGGGWYYNR         | 55928  | Fibrinogen beta chain                       | FGB      |
| ANELLINVK                                  | pQ2     | ANELLINVK          |        | Alcohol Dehydrogenase                       | ADH      |
| SYTITGLQPGTDYK                             | pQ2     | SYTITGLQPGTDYK     | 262625 | Fibronectin 1                               | FN1      |
| DGYLFQLLR                                  | pQ2     | DGYLFQLLR          | 59578  | Histidine-rich glycoprotein                 | HRG      |
| SLAPYAQDTQEK                               | pQ2     | SLAPYAQDTQEK       | 45399  | ApolipoproteinA-IV                          | APOA4    |
| FEDGVLDPDYPR                               | pQ2     | FEDGVLDPDYPR       | 54306  | Vitronectin                                 | VTN      |
| AGEVQEPELR                                 | pQ2     | AGEVQEPELR         | 34259  | Zinc-alpha-2-glycoprotein                   | AZGP1    |
| FLASVSTVLTSK                               | pQ2     | FLASVSTVLTSK       | 15258  | Hemoglobin subunit alpha                    | HBA1     |
| VNVDEVGGEALGR                              | pQ2     | VNVDEVGGEALGR      | 15998  | Hemoglobin subunit beta                     | HBB      |
| FQPTLLTLPR                                 | pQ2     | FQPTLLTLPR         | 55154  | Plasma protease C1 inhibitor                | SERPING1 |
| HSIFTPETNPR                                | pQ2     | HSIFTPETNPR        | 90569  | Plasminogen light chain A                   | PLG      |
| LSSPAVITDK                                 | pQ2     | LSSPAVITDK         | 90569  | Plasminogen light chain B                   | PLG      |
| ASSIIDELFQDR                               | pQ2     | ASSIIDELFQDR       | 52495  | Clusterin                                   | CLU      |
| SGIECQLWR                                  | pQ2     | SGIECQLWR          | 70037  | Prothrombin                                 | F2       |
| LCQDLGPGAFR                                | pQ2     | LCQDLGPGAFR        | 54566  | Alpha-2-antiplasmin                         | SERPINF2 |
| ELLESYIDGR                                 | pQ2     | ELLESYIDGR         | 70037  | Prothrombin                                 | F2       |
| FYNQVSTPLL                                 | pQ2     | FYNQVSTPLL         | 106463 | Inter-alpha-trypsin inhibitor heavy chain 1 | ITI1     |
| GPGGVWAAK                                  | pQ2     | GPGGVWAAK          | 14747  | Serum amyloid A-4 protein                   | SAA4     |
| LDAQASFLPK                                 | pQ2     | LDAQASFLPK         | 101389 | Inter-alpha-trypsin inhibitor heavy chain 2 | ITI2     |
| LGPLVEQGR                                  | pQ2     | LGPLVEQGR          | 36154  | Apolipoprotein E                            | APOE     |

|                  |     |                  |        |                                                      |          |
|------------------|-----|------------------|--------|------------------------------------------------------|----------|
| TGAQELLR         | pQ2 | TGAQELLR         | 85698  | Gelsolin                                             | GSN      |
| VNVDVAVGGEALGR   | pQ2 | VNVDVAVGGEALGR   | 16055  | Hemoglobin subunit delta                             | HBD      |
| ALQDQLVLAALK     | pQ2 | ALQDQLVLAALK     | 53154  | Angiotensinogen                                      | SERPINA8 |
| LGNQEPGGQTALK    | pQ2 | LGNQEPGGQTALK    | 54566  | Alpha-2-antiplasmin                                  | SERPINF2 |
| IVLGQEQDSYGGK    | pQ2 | IVLGQEQDSYGGK    | 25387  | Serum amyloid P-component                            | APCS     |
| TLEAQLTPR        | pQ2 | TLEAQLTPR        | 57071  | Heparin cofactor II                                  | SERPIND1 |
| HAIILLTDGK       | pQ2 | HAIILLTDGK       | 83268  | Complement C2                                        | C2       |
| LSPIYNLVPVK      | pQ2 | LSPIYNLVPVK      | 63173  | Complement C9                                        | C9       |
| SFFSFLGEAFDGR    | pQ2 | SFFSFLGEAFDGR    | 13532  | Serum Amyloid A Protein                              | SAA1     |
| FLVNLVK          | pQ2 | FLVNLVK          | 69069  | Afamin                                               | AFM      |
| DSVTGTLPK        | pQ2 | DSVTGTLPK        | 71370  | Plasma kallikrein                                    | KLKB1    |
| ICLDLQAPLYK      | pQ2 | ICLDLQAPLYK      | 10845  | Platelet factor 4                                    | PLF4     |
| ESYSGVTLDPDR     | pQ2 | ESYSGVTLDPDR     | 188305 | Complement C5                                        | C5       |
| DLLLQPDLR        | pQ2 | DLLLQPDLR        | 38178  | Leucine-rich alpha-2-glycoprotein                    | LRG1     |
| VVGGLVALR        | pQ2 | VVGGLVALR        | 67792  | Coagulation factor XII                               | F12      |
| LGFTDLFSK        | pQ2 | LGFTDLFSK        | 48542  | Kallistatin                                          | SERPINA4 |
| GQVVPALNEK       | pQ2 | GQVVPALNEK       | 60557  | Carboxypeptidase N subunit 2                         | CPN2     |
| AGFAGDDAPR       | pQ2 | AGFAGDDAPR       | 41793  | Actin                                                | ACTG1    |
| IGDYAGIK         | pQ3 | IGDYAGIK         |        | Alcohol Dehydrogenase                                | ADH      |
| GTVEPQLEAR       | pQ3 | GTVEPQLEAR       | 280739 | Filamin-A                                            | FLNA     |
| LSGEAYGFVAR      | pQ3 | LSGEAYGFVAR      | 309265 | von Willebrand factor                                | VWF      |
| GTVTDFPGFDER     | pQ3 | GTVTDFPGFDER     | 35937  | Annexin A5                                           | ANXA5    |
| YGTCIQGR         | pQ3 | YGTCIQGR         | 10201  | Neutrophil defensin 1                                | DEFA1    |
| SFQTGLFTAAR      | pQ3 | SFQTGLFTAAR      | 75123  | Protein S                                            | PROS1    |
| IETISHEDLQR      | pQ3 | IETISHEDLQR      | 75123  | Protein S                                            | PROS1    |
| AFLLTPR          | pQ3 | AFLLTPR          | 21253  | Apolipoprotein M                                     | APOM     |
| LGHPDTLNQGEFK    | pQ3 | LGHPDTLNQGEFK    | 13242  | Protein S100-A9                                      | S100A9   |
| YSFTIELR         | pQ3 | YSFTIELR         | 48424  | Carboxypeptidase B2                                  | CPB2     |
| LNILNANNYK       | pQ3 | LNILNANNYK       | 43974  | Apolipoprotein L1                                    | APOL1    |
| GDTYPAELYITGSILR | pQ3 | GDTYPAELYITGSILR | 75511  | Coagulation Factor XIII B chain                      | F13B     |
| FVFGTTPEDILR     | pQ3 | FVFGTTPEDILR     | 129383 | Thrombospondin-1                                     | THBS1    |
| YTLFQIFSK        | pQ3 | YTLFQIFSK        | 309265 | Von Willebrand Factor                                | VWF      |
| ALEFLQLHNGR      | pQ3 | ALEFLQLHNGR      | 92336  | Phosphatidylinositol-glycan-specific phospholipase C | GPLD1    |
| NIQSLEVIGK       | pQ3 | NIQSLEVIGK       | 13894  | Platelet basic protein                               | CXCL7    |
| TGIVSGFGR        | pQ3 | TGIVSGFGR        | 54732  | Coagulation Factor X                                 | F10      |
| DPPSDLLLLK       | pQ3 | DPPSDLLLLK       | 251703 | Coagulation Factor V                                 | F5       |
| ESISVSSEQLAQFR   | pQ3 | ESISVSSEQLAQFR   | 28870  | Carbonic anhydrase 1                                 | CA1      |
| ATAVVDGAFK       | pQ3 | ATAVVDGAFK       | 21892  | Peroxioredoxin-2                                     | PRDX2    |
| SALVLQYLR        | pQ3 | SALVLQYLR        | 51778  | Coagulation Factor IX                                | F9       |
| GFQALGDAADIR     | pQ3 | GFQALGDAADIR     | 23171  | Metalloproteinase inhibitor 1                        | TIMP1    |
| SDGSCAWYR        | pQ3 | SDGSCAWYR        | 24399  | Metalloproteinase inhibitor 2                        | TIMP2    |
| ALNSIIDVYHK      | pQ3 | ALNSIIDVYHK      | 10835  | Protein S100-A8                                      | S100A8   |
| LSQEDPDYGR       | pQ3 | LSQEDPDYGR       | 59756  | Catalase                                             | CAT      |
| ITLPDFTGDLR      | pQ3 | ITLPDFTGDLR      | 53384  | Lipopolysaccharide-binding protein                   | LBP      |
| TSEGLPSTR        | pQ3 | TSEGLPSTR        | 70109  | Coagulation factor XI                                | F11      |
| GYSIFSATK        | pQ3 | GYSIFSATK        | 25039  | C-reactive protein                                   | CRP      |
| ESDTSYVSLK       | pQ3 | ESDTSYVSLK       | 25039  | C-reactive protein                                   | CRP      |
| LISWYDNEFGYSNR   | pQ3 | LISWYDNEFGYSNR   | 36053  | Glyceraldehyde-3-phosphate dehydrogenase             | GAPDH    |
| LGDDLLQCHPAVK    | pQ3 | LGDDLLQCHPAVK    | 52071  | Protein C                                            | PROC     |
| TFVLNFIK         | pQ3 | TFVLNFIK         | 52071  | Protein C                                            | PROC     |
| FEDENFILK        | pQ3 | FEDENFILK        | 18012  | Peptidyl-prolyl cis-trans isomerase A                | PPIA     |
| SISIVGSYVGNR     | pQ4 | SISIVGSYVGNR     |        | Alcohol Dehydrogenase                                | ADH      |
| AEIEYLEK         | pQ4 | AEIEYLEK         | 42187  | L-selectin                                           | SELL     |
| IYVVDVGSEPR      | pQ4 | IYVVDVGSEPR      | 52391  | Selenium-binding protein 1                           | SELENBP1 |
| TVAGQDAVIVLLGTR  | pQ4 | TVAGQDAVIVLLGTR  | 22119  | Flavin reductase (NADPH)                             | BLVRB    |
| TEGQFVDLTGNR     | pQ4 | TEGQFVDLTGNR     | 26144  | Mannose-binding protein C                            | MBL2     |

|                 |     |                 |        |                                         |          |
|-----------------|-----|-----------------|--------|-----------------------------------------|----------|
| YLGVTLSPR       | pQ4 | YLGVTLSPR       | 60959  | Platelet glycoprotein V                 | GP5      |
| STVLTIPETIIK    | pQ4 | STVLTIPETIIK    | 83267  | Coagulation Factor XIII A chain         | F13A1    |
| IAQYYTFFK       | pQ4 | IAQYYTFFK       | 75511  | Coagulation Factor XIII B chain         | F13B     |
| LVQAFQFTDK      | pQ4 | LVQAFQFTDK      | 22110  | Peroxioredoxin-1                        | PRDX1    |
| FLVGPDPGIPIMR   | pQ4 | FLVGPDPGIPIMR   | 25552  | Glutathione peroxidase 3                | GPX3     |
| VVDVLDSIK       | pQ4 | VVDVLDSIK       | 29246  | Carbonic anhydrase 2                    | CA2      |
| VVLEGGIDPILR    | pQ4 | VVLEGGIDPILR    | 83869  | Myeloperoxidase                         | MPO      |
| VNVTVEDER       | pQ4 | VNVTVEDER       | 33068  | coagulation factor III (thromboplastin) | F3       |
| LGLGADVAQVTGALR | pQ4 | LGLGADVAQVTGALR | 78458  | Matrix metalloproteinase-9              | MMP9     |
| FSLVSGWGQLLDR   | pQ4 | FSLVSGWGQLLDR   | 51594  | Coagulation factor VII                  | F7       |
| FADLSEANR       | pQ4 | FADLSEANR       | 53652  | Vimentin                                | VIM      |
| LSILYPATTGR     | pQ4 | LSILYPATTGR     | 25035  | Peroxioredoxin-6                        | PRDX6    |
| AFQVWSDVTPLR    | pQ4 | AFQVWSDVTPLR    | 73882  | 72 kDa type IV collagenase              | MMP2     |
| FSLETEVDLR      | pQ4 | FSLETEVDLR      | 45060  | Plasminogen activator inhibitor 1       | SERPINE1 |
| VFQQVAQASK      | pQ4 | VFQQVAQASK      | 45060  | Plasminogen activator inhibitor 1       | SERPINE1 |
| LAEVALAYAK      | pQ4 | LAEVALAYAK      | 36295  | Delta-aminolevulinic acid dehydratase   | ALAD     |
| VVLGAHNLSR      | pQ4 | VVLGAHNLSR      | 28518  | Neutrophil elastase                     | ELANE    |
| GPMFELLPGESNK   | pQ4 | GPMFELLPGESNK   | 17652  | Serglycin                               | SRGN     |
| SQYLNNGPQR      | pQ4 | SQYLNNGPQR      | 267009 | Coagulation factor VIII                 | F8       |
| SEEFLLIAGK      | pQ4 | SEEFLLIAGK      | 23171  | Metalloproteinase inhibitor 1           | TIMP1    |
| NYTPQLSEAEVER   | pQ4 | NYTPQLSEAEVER   | 53412  | Neutrophil collagenase                  | MMP8     |

| Supplementary Table 2 - QconCAT report |                                                        |         |                             |         |         |         |         |         |         |         |         |         |         |          |       |             |
|----------------------------------------|--------------------------------------------------------|---------|-----------------------------|---------|---------|---------|---------|---------|---------|---------|---------|---------|---------|----------|-------|-------------|
| Protein                                | GENE                                                   | MW      | Protein Abundance (pmol/ug) |         |         |         |         |         |         |         |         |         |         |          | Trend | Tech CV (%) |
|                                        |                                                        |         | pre                         | post    | 3h      | D1      | D2      | D7      | D14     | D21     | D28     | D35     | D42     |          |       |             |
| 1                                      | Alpha-2-macroglobulin                                  | A2M     | 163291                      | 1351.03 | 1209.39 | 995.39  | 1205.05 | 1028.90 | 859.89  | 1033.59 | 1233.73 | 982.76  | 1196.86 | 1087.92  |       | 11.20%      |
| 2                                      | Actin                                                  | ACTG1   | 41793                       | 6.46    | 4.35    | 4.45    | 4.83    | 5.08    | 3.44    | 3.87    | 4.53    | 3.91    | 4.35    | 4.83     |       | 4.83%       |
| 3                                      | Afamin                                                 | AFM     | 69069                       | 80.84   | 76.01   | 68.62   | 73.31   | 79.56   | 57.35   | 76.44   | 78.57   | 65.83   | 76.87   | 75.15    |       | 4.43%       |
| 4                                      | Alpha-2-HS-glycoprotein                                | AHSG    | 39325                       | 378.75  | 341.67  | 342.42  | 365.22  | 337.35  | 241.00  | 339.92  | 388.88  | 344.91  | 372.72  | 364.76   |       | 2.02%       |
| 5                                      | Delta-aminolevulinic acid dehydratase                  | ALAD    | 36295                       | 0.42    | 0.58    | 0.37    | 0.46    | 0.56    | 0.56    | 0.73    | 0.82    | 1.28    | 1.11    | 1.51     |       | 18.39%      |
| 6                                      | Albumin                                                | ALB     | 69367                       | 63.28   | 49.53   | 45.56   | 55.75   | 54.30   | 43.45   | 49.88   | 57.59   | 46.96   | 51.32   | 51.01    |       | 8.46%       |
| 7                                      | Annexin A5                                             | ANXA5   | 35937                       | 0.12    | 0.09    | 0.12    | 0.10    | 0.11    | 0.10    | 0.09    | 0.10    | 0.12    | 0.17    | 0.15     |       | 21.21%      |
| 8                                      | Serum amyloid P-component                              | APCS    | 25387                       | 48.64   | 43.43   | 37.53   | 36.76   | 41.55   | 26.15   | 31.62   | 37.92   | 35.39   | 44.90   | 43.15    |       | 4.61%       |
| 9                                      | Apolipoprotein A-I                                     | APOA1   | 30778                       | 1993.55 | 1948.75 | 1674.27 | 2006.82 | 1912.93 | 1492.10 | 1863.19 | 2025.01 | 1872.84 | 2051.13 | 1935.11  |       | 3.39%       |
| 10                                     | Apolipoprotein A-II                                    | APOA2   | 11175                       | 1713.84 | 1533.67 | 1356.14 | 1541.31 | 1557.41 | 1081.72 | 1383.03 | 1535.25 | 1359.13 | 1506.60 | 1475.00  |       | 3.00%       |
| 11                                     | Apolipoprotein A-IV                                    | APOA4   | 45399                       | 127.88  | 105.49  | 86.87   | 98.25   | 95.35   | 75.92   | 99.93   | 128.38  | 103.43  | 106.22  | 109.01   |       | 5.20%       |
| 12                                     | Apolipoprotein B-100                                   | APOB    | 114874                      | 28.74   | 29.00   | 25.00   | 31.82   | 30.61   | 24.43   | 31.62   | 38.14   | 33.81   | 36.10   | 33.99    |       | 3.49%       |
| 13                                     | Apolipoprotein C-I                                     | APOC1   | 9332                        | 207.40  | 187.51  | 154.57  | 190.41  | 180.92  | 135.02  | 167.37  | 186.41  | 171.46  | 195.33  | 179.67   |       | 2.96%       |
| 14                                     | Apolipoprotein C-II                                    | APOC2   | 11284                       | 85.13   | 79.82   | 75.17   | 87.49   | 78.57   | 57.71   | 76.83   | 88.74   | 77.66   | 82.79   | 81.77    |       | 4.08%       |
| 15                                     | Apolipoprotein C-III                                   | APOC3   | 10852                       | 192.20  | 156.16  | 132.87  | 152.36  | 137.20  | 96.48   | 130.69  | 136.64  | 128.79  | 143.40  | 138.97   |       | 2.35%       |
| 16                                     | Apolipoprotein D                                       | APOD    | 21276                       | 93.68   | 79.01   | 73.24   | 79.08   | 80.03   | 59.04   | 72.81   | 82.50   | 71.91   | 76.32   | 68.11    |       | 3.31%       |
| 17                                     | Apolipoprotein E                                       | APOE    | 36154                       | 45.13   | 38.10   | 38.40   | 45.82   | 50.61   | 33.61   | 49.62   | 58.09   | 43.77   | 54.61   | 50.50    |       | 5.16%       |
| 18                                     | Apolipoprotein H (B2-glycoprotein1)                    | APOH    | 38298                       | 179.67  | 171.58  | 159.60  | 173.74  | 153.32  | 136.64  | 173.82  | 176.78  | 168.00  | 180.94  | 186.40   |       | 3.23%       |
| 19                                     | Apolipoprotein L1                                      | APOPL1  | 43974                       | 4.43    | 4.62    | 4.12    | 5.38    | 4.98    | 2.92    | 4.95    | 6.31    | 4.99    | 5.54    | 4.96     |       | 11.07%      |
| 20                                     | Apolipoprotein M                                       | APOPM   | 21253                       | 17.00   | 16.37   | 13.85   | 16.66   | 14.98   | 11.70   | 15.87   | 15.67   | 14.73   | 17.19   | 15.79    |       | 45.00%      |
| 21                                     | Zinc-alpha-2-glycoprotein                              | AZGP1   | 34259                       | 108.73  | 90.98   | 75.95   | 88.41   | 90.77   | 69.15   | 81.79   | 88.73   | 79.17   | 89.58   | 89.29    |       | 5.04%       |
| 22                                     | Flavin reductase (NADPH)                               | BLVRB   | 22119                       | 1.61    | 2.93    | 2.31    | 2.84    | 3.08    | 3.66    | 5.71    | 5.44    | 8.80    | 8.70    | 12.52    |       | 7.97%       |
| 23                                     | Complement C2                                          | C2      | 83268                       | 16.35   | 16.09   | 16.33   | 15.45   | 19.98   | 12.04   | 15.99   | 17.74   | 12.98   | 16.41   | 13.91    |       | 17.92%      |
| 24                                     | Complement C3                                          | C3      | 187148                      | 229.65  | 276.40  | 257.42  | 289.76  | 307.01  | 200.51  | 299.94  | 324.90  | 303.75  | 329.48  | 297.60   |       | 6.08%       |
| 25                                     | Complement C4 B beta chain                             | C4B     | 192751                      | 114.20  | 111.27  | 103.67  | 122.25  | 110.92  | 91.60   | 112.58  | 111.64  | 108.35  | 121.77  | 110.71   |       | 8.12%       |
| 26                                     | Complement C5                                          | C5      | 188305                      | 27.92   | 31.68   | 27.85   | 33.66   | 36.21   | 22.36   | 30.24   | 31.25   | 27.34   | 29.21   | 28.03    |       | 6.30%       |
| 27                                     | Complement C9                                          | C9      | 63173                       | 16.25   | 18.36   | 18.05   | 19.53   | 21.61   | 12.99   | 17.69   | 20.89   | 16.69   | 18.16   | 17.39    |       | 3.27%       |
| 28                                     | Carbonic anhydrase 1                                   | CA1     | 28870                       | 13.88   | 55.63   | 42.57   | 65.35   | 65.73   | 66.72   | 126.17  | 159.59  | 202.96  | 264.70  | 331.16   |       | 6.14%       |
| 29                                     | Carbonic anhydrase 2                                   | CA2     | 29246                       | 0.28    | 0.96    | 0.68    | 0.95    | 1.19    | 1.76    | 2.98    | 3.56    | 6.01    | 7.80    | 10.87    |       | 13.73%      |
| 30                                     | Catalase                                               | CAT     | 59756                       | 2.06    | 5.41    | 3.69    | 5.90    | 5.63    | 5.29    | 10.61   | 14.02   | 20.40   | 22.20   | 26.16    |       | 6.38%       |
| 31                                     | Complement factor H                                    | CFH     | 139096                      | 112.28  | 48.67   | 41.79   | 44.74   | 48.29   | 35.12   | 44.83   | 46.58   | 46.36   | 49.56   | 47.34    |       | 3.02%       |
| 32                                     | Clusterin                                              | CLU     | 52495                       | 105.51  | 56.17   | 52.74   | 58.19   | 58.10   | 35.16   | 60.82   | 62.11   | 57.72   | 62.99   | 61.75    |       | 4.34%       |
| 33                                     | Ceruloplasmin                                          | CP      | 122205                      | 365.42  | 312.27  | 258.47  | 302.78  | 300.60  | 234.30  | 276.17  | 293.48  | 266.71  | 300.03  | 265.10   |       | 6.90%       |
| 34                                     | Carboxypeptidase B2                                    | CPB2    | 48424                       | 3.72    | 4.59    | 4.36    | 5.48    | 4.33    | 3.35    | 4.92    | 4.82    | 4.08    | 4.73    | 4.34     |       | 4.49%       |
| 35                                     | Carboxypeptidase N subunit 2                           | CPN2    | 60557                       | 15.63   | 15.29   | 14.42   | 15.83   | 17.49   | 10.70   | 15.44   | 17.57   | 14.98   | 17.71   | 17.19    |       | 4.81%       |
| 36                                     | C-reactive protein                                     | CRP     | 25039                       | 9.03    | 8.34    | 6.77    | 9.03    | 7.76    | 5.47    | 7.37    | 9.53    | 7.65    | 9.01    | 8.07     |       | 8.36%       |
| 37                                     | Platelet basic protein                                 | CXCL7   | 13894                       | 3.86    | 29.41   | 27.27   | 36.91   | 26.06   | 20.94   | 29.47   | 30.95   | 26.63   | 36.60   | 30.77    |       | 5.35%       |
| 38                                     | Neutrophil defensin 1                                  | DEFA1   | 10201                       | 0.92    | 0.44    | 0.54    | 0.49    | 0.48    | 0.43    | 0.45    | 0.54    | 0.45    | 0.55    | 0.57     |       | 7.99%       |
| 39                                     | Neutrophil elastase                                    | ELANE   | 28518                       | 1.66    | 1.42    | 1.22    | 1.31    | 1.32    | 1.10    | 1.10    | 1.30    | 1.51    | 1.35    | 1.39     |       | 12.02%      |
| 40                                     | Coagulation factor X                                   | F10     | 54732                       | 7.53    | 6.36    | 6.05    | 7.44    | 6.21    | 4.50    | 6.67    | 6.92    | 6.65    | 8.08    | 7.00     |       | 4.23%       |
| 41                                     | Coagulation factor XI                                  | F11     | 70109                       | 6.69    | 1.31    | 1.32    | 1.60    | 1.34    | 0.98    | 1.33    | 1.44    | 1.30    | 1.61    | 1.18     |       | 7.04%       |
| 42                                     | Coagulation factor XII                                 | F12     | 67792                       | 46.91   | 39.41   | 30.80   | 38.04   | 39.56   | 23.83   | 38.80   | 35.34   | 32.82   | 36.65   | 37.09    |       | 10.41%      |
| 43                                     | Coagulation factor XIII A chain                        | F13A1   | 83267                       | 2.65    | 1.55    | 1.02    | 2.64    | 1.57    | 1.53    | 2.54    | 1.42    | 2.49    | 3.58    | 1.94     |       | 26.78%      |
| 44                                     | Coagulation factor XIII B chain                        | F13B    | 75511                       | 7.36    | 4.12    | 3.70    | 4.62    | 3.71    | 3.03    | 3.77    | 4.10    | 3.81    | 4.41    | 4.13     |       | 7.79%       |
| 45                                     | Prothrombin                                            | F2      | 70037                       | 97.10   | 92.58   | 88.87   | 103.06  | 104.56  | 63.90   | 93.27   | 102.40  | 95.57   | 107.05  | 105.10   |       | 3.63%       |
| 46                                     | Coagulation factor III (thromboplastin, tissue factor) | F3      | 33068                       | 1.29    | 1.19    | 1.12    | 1.04    | 1.11    | 1.06    | 1.09    | 1.29    | 1.19    | 1.25    | 1.22     |       | 4.69%       |
| 47                                     | Coagulation factor V                                   | F5      | 251703                      | 3.24    | 1.16    | 1.12    | 1.53    | 1.19    | 0.97    | 1.18    | 1.17    | 1.28    | 1.75    | 1.68     |       | 6.92%       |
| 48                                     | Coagulation factor VII                                 | F7      | 51594                       | 2.44    | 3.51    | 4.00    | 2.43    | 3.39    | 3.14    | 3.05    | 4.19    | 2.88    | 2.58    | 3.28     |       | 41.49%      |
| 49                                     | Coagulation factor VIII                                | F8      | 267009                      | 1.31    | 1.05    | 1.15    | 1.09    | 1.33    | 1.13    | 1.19    | 1.32    | 1.24    | 1.28    | 1.37     |       | 7.03%       |
| 50                                     | Coagulation factor IX                                  | F9      | 51778                       | 11.63   | 8.96    | 8.84    | 11.22   | 8.23    | 5.62    | 8.43    | 9.75    | 8.88    | 10.66   | 9.17     |       | 6.70%       |
| 51                                     | Fibrinogen alpha chain                                 | FGA     | 94973                       | 853.07  | 607.90  | 516.71  | 581.47  | 568.32  | 407.56  | 548.03  | 571.09  | 522.67  | 573.97  | 553.95   |       | 5.11%       |
| 52                                     | Fibrinogen beta chain                                  | FBG     | 55928                       | 2354.75 | 1682.86 | 1493.93 | 1545.45 | 1508.47 | 1270.09 | 1617.04 | 1747.57 | 1536.45 | 1696.05 | 1626.71  |       | 6.69%       |
| 53                                     | Fibrinogen gamma chain                                 | FGG     | 51512                       | 1034.46 | 764.18  | 685.11  | 754.11  | 725.26  | 554.32  | 739.10  | 778.10  | 717.84  | 805.26  | 782.19   |       | 3.66%       |
| 54                                     | Filamin-A                                              | FLNA    | 280739                      | 0.17    | 0.13    | 0.12    | 0.10    | 0.12    | 0.12    | 0.14    | 0.13    | 0.12    | 0.16    | 0.11     |       | 16.16%      |
| 55                                     | Fibronectin 1                                          | FN1     | 262625                      | 21.65   | 52.94   | 51.99   | 55.55   | 67.08   | 43.84   | 55.43   | 67.07   | 50.11   | 58.06   | 60.60    |       | 8.35%       |
| 56                                     | Glyceraledehyde-3-phosphate dehydrogenase              | GAPDH   | 36053                       | 3.52    | 5.42    | 3.43    | 8.06    | 5.53    | 6.17    | 10.03   | 12.29   | 16.71   | 18.55   | 25.40    |       | 10.79%      |
| 57                                     | Vitamin D-binding protein                              | GC      | 52964                       | 190.33  | 174.91  | 148.02  | 163.73  | 161.52  | 114.15  | 161.25  | 167.14  | 150.69  | 168.07  | 145.03   |       | 7.19%       |
| 58                                     | Platelet glycoprotein V                                | GP5     | 60959                       | 1.38    | 1.31    | 1.32    | 1.08    | 1.32    | 1.19    | 1.22    | 1.30    | 1.28    | 1.25    | 1.52     |       | 9.42%       |
| 59                                     | Phosphatidylinositol-glycan-specific phospholipase D   | GPLD1   | 92336                       | 4.05    | 3.50    | 3.23    | 3.99    | 3.50    | 2.29    | 3.05    | 4.22    | 3.22    | 3.86    | 3.62     |       | 10.08%      |
| 60                                     | Glutathione peroxidase 3                               | GPX3    | 25552                       | 9.94    | 9.05    | 7.78    | 8.72    | 8.44    | 6.90    | 7.53    | 8.12    | 7.80    | 8.04    | 7.94     |       | 2.22%       |
| 61                                     | Gelsolin                                               | GSN     | 85698                       | 26.92   | 28.78   | 26.85   | 34.26   | 34.36   | 28.32   | 30.63   | 35.07   | 30.33   | 35.70   | 37.77    |       | 2.64%       |
| 62                                     | Hemoglobin subunit alpha                               | HBA1    | 15258                       | 370.15  | 1539.83 | 1180.03 | 1673.52 | 1674.66 | 2061.91 | 3587.26 | 4405.65 | 7038.37 | 7842.40 | 10335.54 |       | 3.61%       |
| 63                                     | Hemoglobin subunit beta                                | HBB     | 15998                       | 743.73  | 2431.11 | 1704.63 | 2401.09 | 2799.14 | 2895.23 | 4925.44 | 5742.34 | 7611.57 | 8967.16 | 11578.61 |       | 2.03%       |
| 64                                     | Hemoglobin subunit delta                               | HBD     | 16055                       | 26.05   | 79.03   | 58.72   | 83.02   | 93.43   | 93.24   | 162.32  | 194.70  | 271.49  | 304.84  | 421.95   |       | 3.07%       |
| 65                                     | Haptoglobin                                            | HP      | 45205                       | 1885.31 | 1506.18 | 1415.41 | 1485.62 | 1326.94 | 1053.81 | 1419.54 | 1420.48 | 1276.97 | 1407.11 | 1333.27  |       | 6.33%       |
| 66                                     | Hemopexin                                              | HPX     | 51676                       | 964.84  | 796.06  | 729.20  | 791.83  | 772.42  | 609.91  | 762.87  | 812.88  | 756.26  | 832.22  | 750.20   |       | 3.91%       |
| 67                                     | Histidine-rich glycoprotein                            | HRG     | 95978                       | 205.25  | 14.41   | 15.49   | 46.27   | 45.36   | 13.64   | 39.29   | 39.33   | 43.22   | 81.61   | 52.57    |       | 129.62%     |
| 68                                     | Ig gamma-(1-4) chain C region (IGHG1)                  | IGHG1-4 | 36106                       | 20.15   | 14.53   | 12.37   | 14.95   | 13.05   | 10.47   | 12.67   | 13.41   | 11.22   | 12.98   | 12.54    |       |             |

|     |                               |          |        |         |         |         |         |         |         |         |         |         |         |         |                                                                                     |        |
|-----|-------------------------------|----------|--------|---------|---------|---------|---------|---------|---------|---------|---------|---------|---------|---------|-------------------------------------------------------------------------------------|--------|
| 105 | Plasma protease C1 inhibitor  | SERPING1 | 55154  | 178.58  | 182.99  | 168.18  | 192.61  | 201.16  | 129.21  | 183.07  | 202.95  | 164.31  | 193.96  | 184.40  |  | 6.09%  |
| 106 | Serglycin                     | SRGN     | 17652  | 0.21    | 0.84    | 0.63    | 0.68    | 0.82    | 0.56    | 0.64    | 0.62    | 0.85    | 0.73    | 0.86    |  | 12.62% |
| 107 | Serotransferrin               | TF       | 77064  | 2731.64 | 2506.83 | 2167.81 | 2422.01 | 2247.47 | 1710.93 | 2220.89 | 2399.74 | 2150.27 | 2352.15 | 2043.05 |  | 4.77%  |
| 108 | Thrombospondin-1              | THBS1    | 129383 | 0.27    | 1.94    | 1.72    | 2.22    | 1.89    | 1.45    | 1.85    | 2.23    | 1.95    | 2.16    | 1.99    |  | 1.28%  |
| 109 | Metalloproteinase inhibitor 1 | TIMP1    | 23171  | 0.80    | 1.06    | 0.97    | 1.37    | 1.13    | 0.94    | 1.16    | 1.11    | 1.19    | 1.19    | 1.00    |  | 15.96% |
| 110 | Metalloproteinase inhibitor 2 | TIMP2    | 24399  | 1.43    | 1.37    | 1.02    | 1.10    | 1.07    | 0.83    | 1.14    | 1.11    | 1.34    | 1.21    | 1.35    |  | 16.75% |
| 111 | Transthyretin                 | TTR      | 15887  | 73.54   | 45.59   | 44.55   | 54.93   | 49.96   | 33.95   | 48.15   | 52.90   | 41.09   | 50.93   | 45.16   |  | 4.99%  |
| 112 | Vimentin                      | VIM      | 53652  | 1.24    | 1.12    | 1.16    | 1.18    | 1.15    | 1.10    | 1.09    | 1.36    | 1.22    | 1.40    | 1.34    |  | 6.64%  |
| 113 | Vitronectin                   | VTN      | 54306  | 266.20  | 173.93  | 147.04  | 181.57  | 179.42  | 129.71  | 167.81  | 179.90  | 157.27  | 175.09  | 172.41  |  | 4.12%  |
| 114 | von Willebrand factor         | VWF      | 309265 | 1.52    | 1.15    | 1.32    | 0.45    | 0.92    | 0.98    | 1.78    | 1.64    | 1.17    | 0.75    | 1.51    |  | 45.32% |

\*\*pmol/ug = fmol of total protein per ug of protein post-depletion

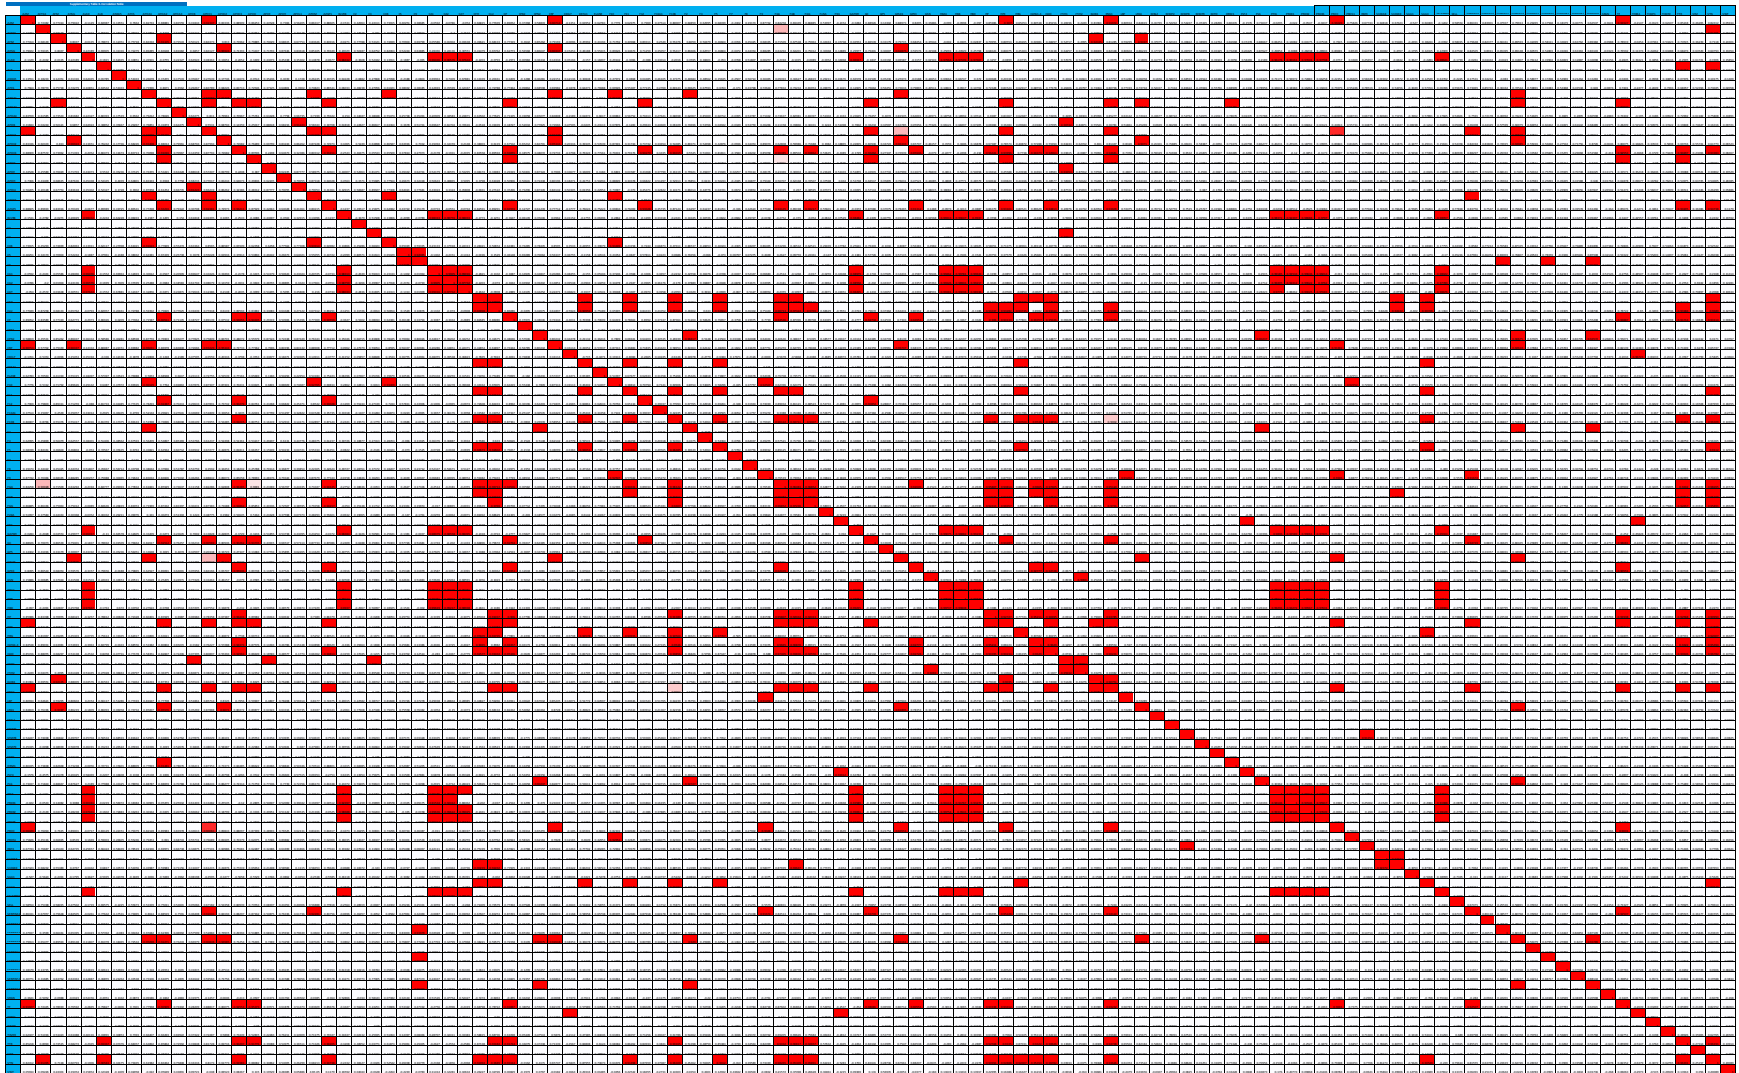

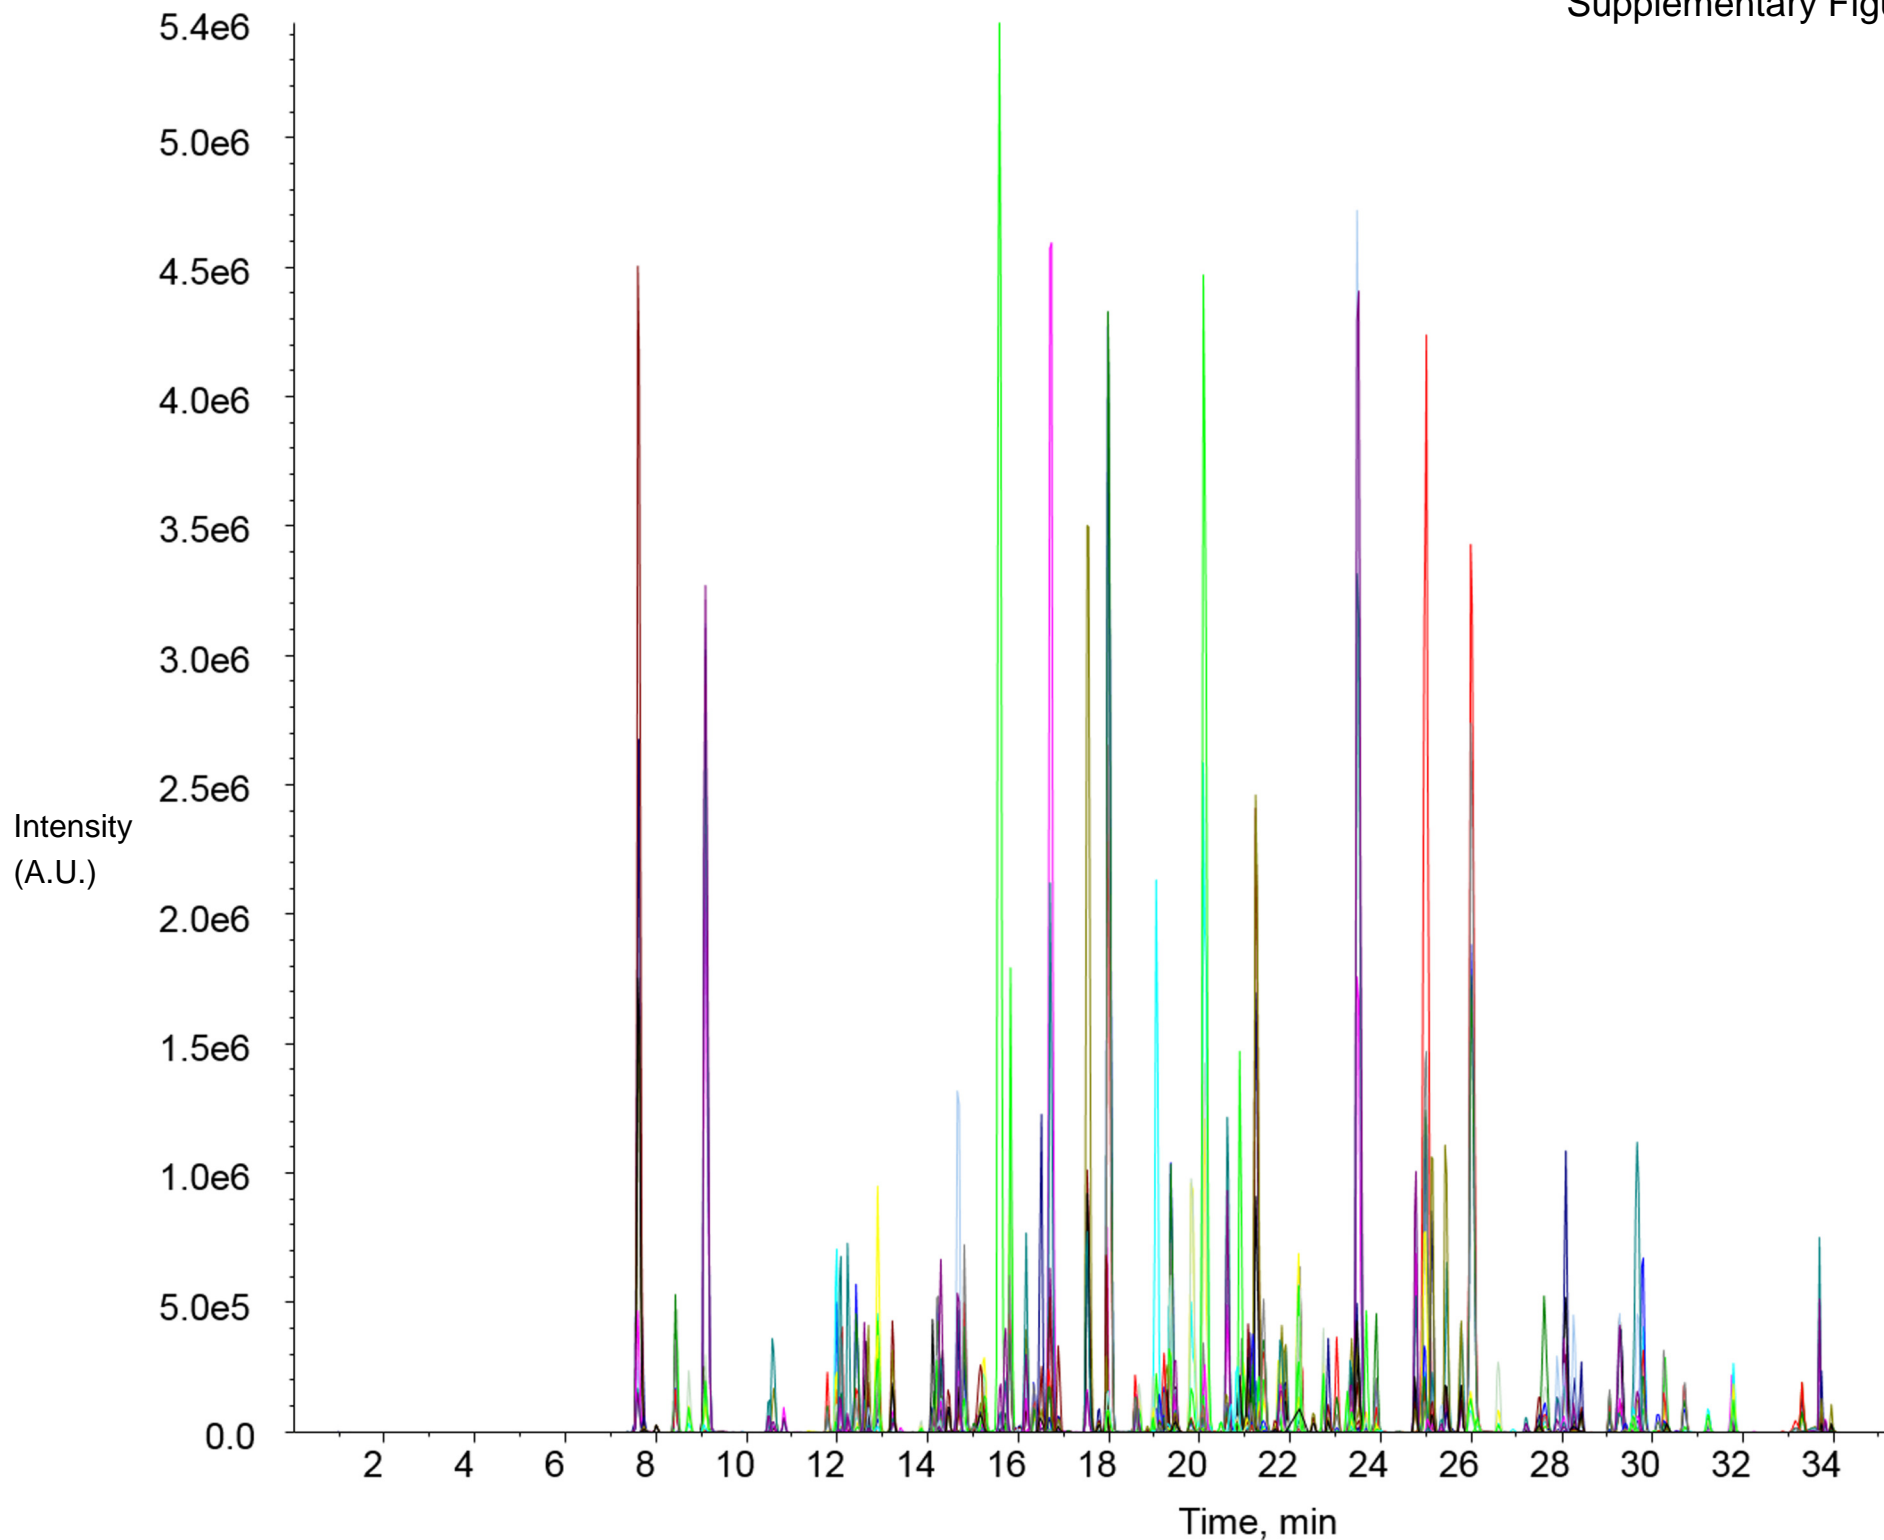



Annotation-1  
 Coag/Comp  
 Enzyme  
 Hemoglobin  
 Redox  
 Structure  
 Structure/ECM

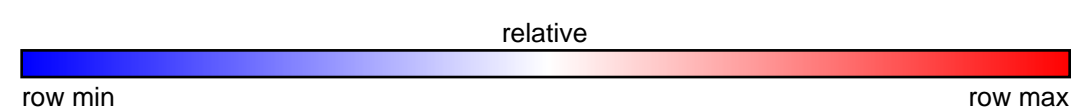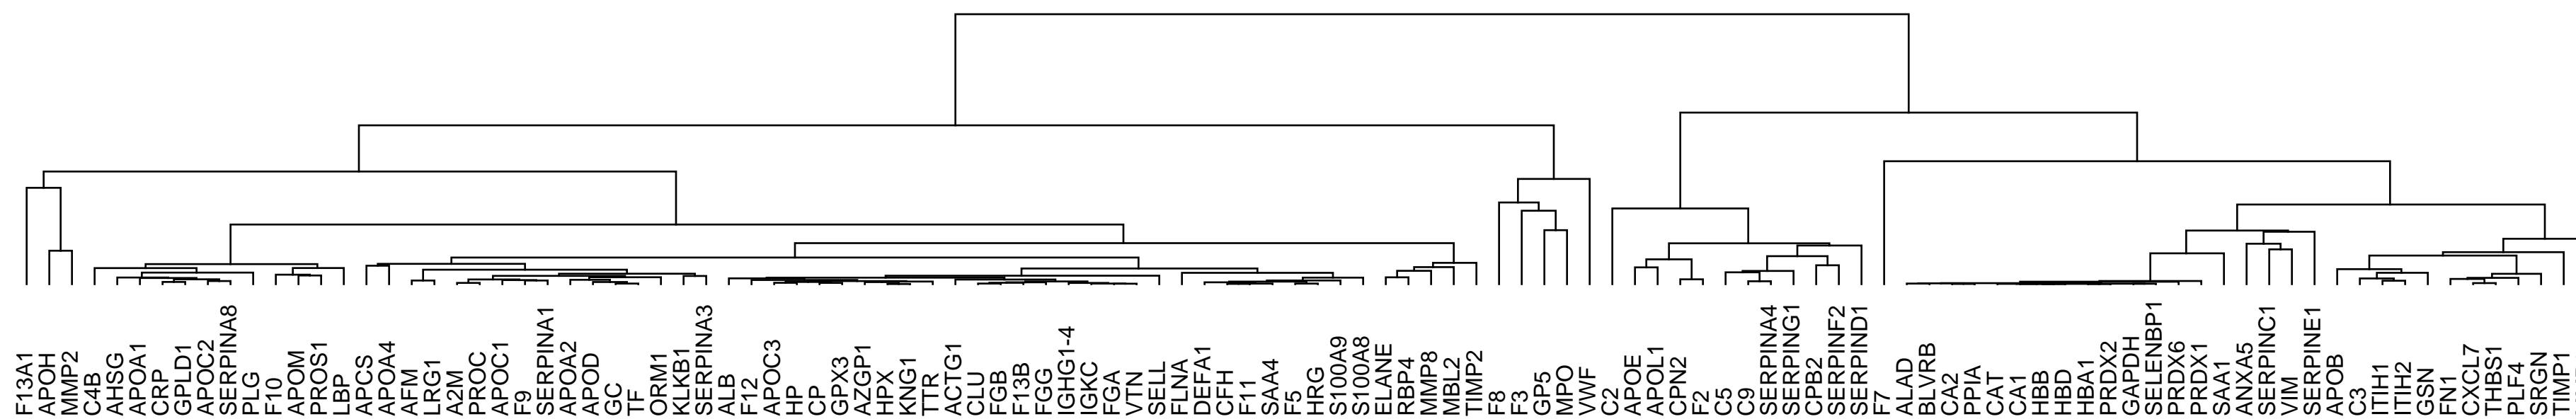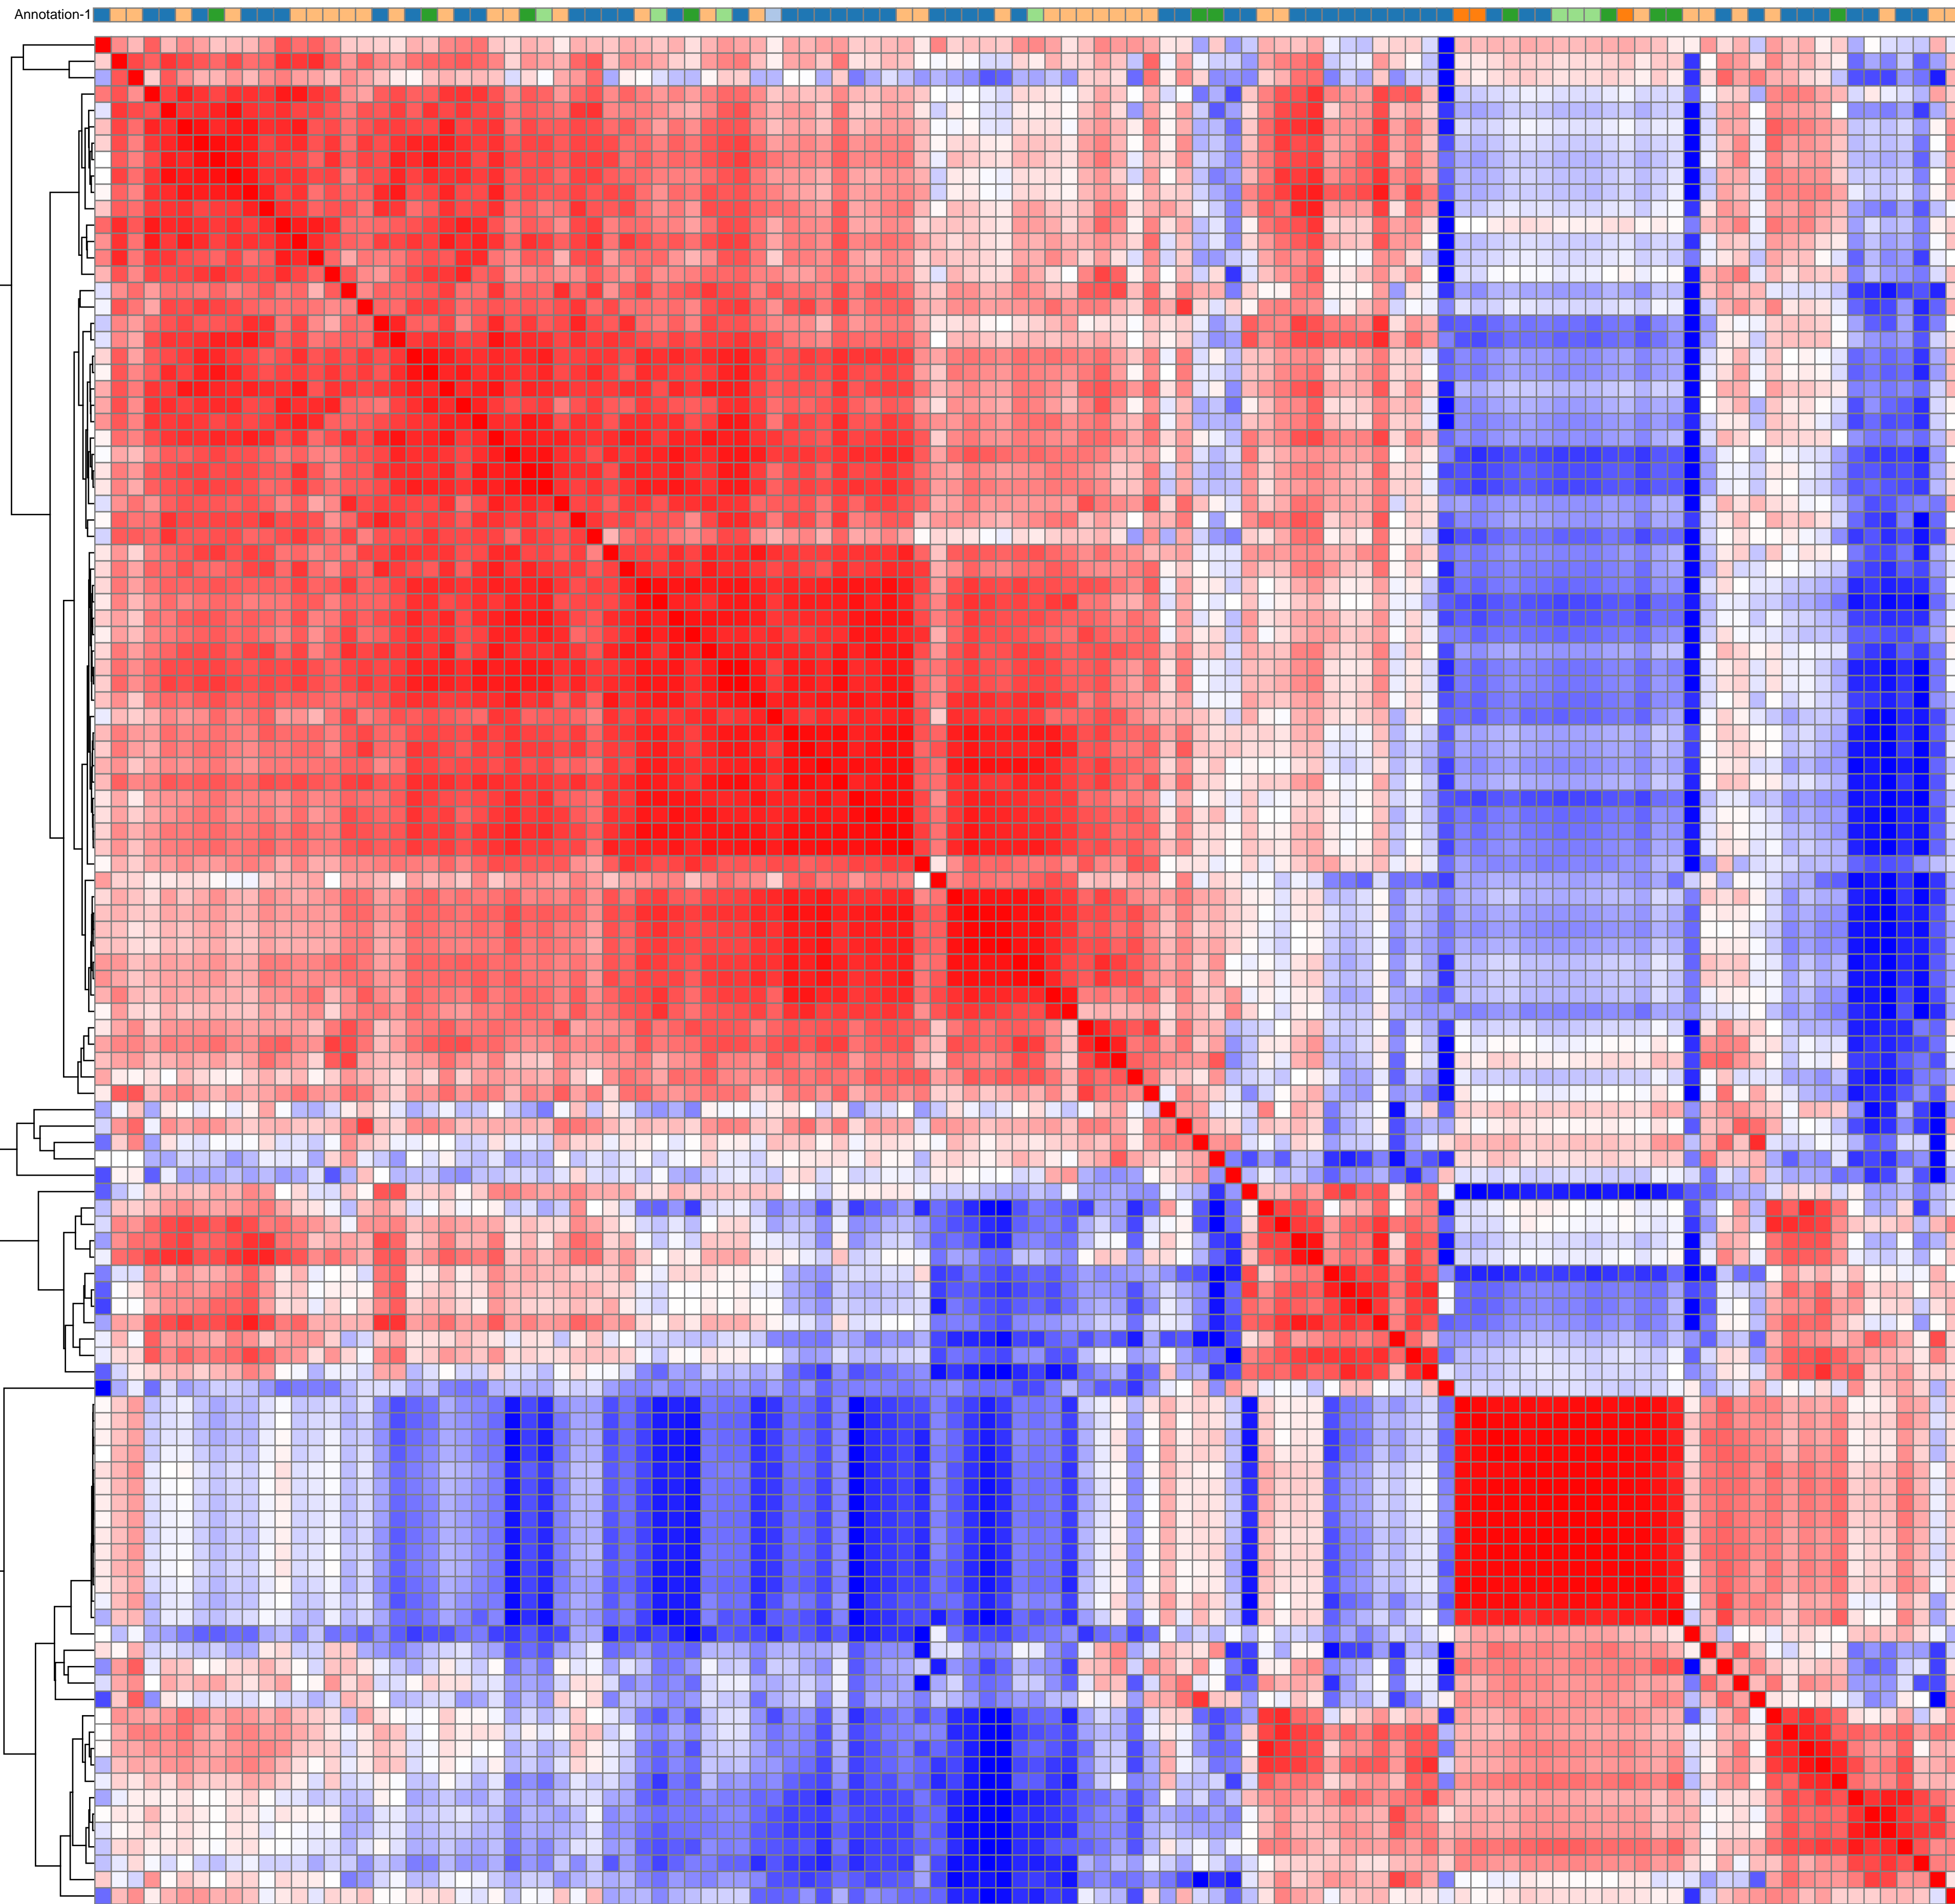

| Annotation | Annotation-1  |
|------------|---------------|
| F13A1      | Coag/Comp     |
| APOH       | Structure/ECM |
| MMP2       | Structure/ECM |
| C4B        | Coag/Comp     |
| AHSG       | Coag/Comp     |
| APOA1      | Structure/ECM |
| CRP        | Coag/Comp     |
| GPLD1      | Redox         |
| APOC2      | Structure/ECM |
| SERPINA8   | Coag/Comp     |
| PLG        | Coag/Comp     |
| F10        | Coag/Comp     |
| APOM       | Structure/ECM |
| PROS1      | Structure/ECM |
| LBP        | Structure/ECM |
| APCS       | Structure/ECM |
| APOA4      | Structure/ECM |
| AFM        | Coag/Comp     |
| LRG1       | Structure/ECM |
| A2M        | Coag/Comp     |
| PROC       | Redox         |
| APOC1      | Structure/ECM |
| F9         | Coag/Comp     |
| SERPINA1   | Coag/Comp     |
| APOA2      | Structure/ECM |
| APOD       | Structure/ECM |
| GC         | Redox         |
| TF         | Hemoglobin    |
| ORM1       | Structure/ECM |
| KLKB1      | Coag/Comp     |
| SERPINA3   | Coag/Comp     |
| ALB        | Coag/Comp     |
| F12        | Coag/Comp     |
| APOC3      | Structure/ECM |
| HP         | Hemoglobin    |
| CP         | Coag/Comp     |
| GPX3       | Redox         |
| AZGP1      | Structure/ECM |
| HPX        | Hemoglobin    |
| KNG1       | Coag/Comp     |
| TTR        | Structure/ECM |
| ACTG1      | Structure     |
| CLU        | Coag/Comp     |
| FGB        | Coag/Comp     |
| F13B       | Coag/Comp     |
| FGG        | Coag/Comp     |
| IGHG1-4    | Coag/Comp     |
| IGKC       | Coag/Comp     |
| FGA        | Coag/Comp     |
| VTN        | Structure/ECM |
| SELL       | Structure/ECM |
| FLNA       | Coag/Comp     |
| DEFA1      | Coag/Comp     |
| CFH        | Coag/Comp     |
| F11        | Coag/Comp     |
| SAA4       | Structure/ECM |
| F5         | Coag/Comp     |
| HRG        | Hemoglobin    |
| S100A9     | Structure/ECM |
| S100A8     | Structure/ECM |
| ELANE      | Structure/ECM |
| RBP4       | Structure/ECM |
| MMP8       | Structure/ECM |
| MBL2       | Structure/ECM |
| TIMP2      | Structure/ECM |
| F8         | Coag/Comp     |
| F3         | Coag/Comp     |
| GP5        | Redox         |
| MPO        | Redox         |
| VWF        | Coag/Comp     |
| C2         | Coag/Comp     |
| APOE       | Structure/ECM |
| APOL1      | Structure/ECM |
| CPN2       | Coag/Comp     |
| F2         | Coag/Comp     |
| C5         | Coag/Comp     |
| C9         | Coag/Comp     |
| SERPINA4   | Coag/Comp     |
| SERPING1   | Coag/Comp     |
| CPB2       | Coag/Comp     |
| SERPINF2   | Coag/Comp     |
| SERPIND1   | Coag/Comp     |
| F7         | Coag/Comp     |
| ALAD       | Enzyme        |
| BLVRB      | Enzyme        |
| CA2        | Coag/Comp     |
| PPIA       | Redox         |
| CAT        | Coag/Comp     |
| CA1        | Coag/Comp     |
| HBB        | Hemoglobin    |
| HBD        | Hemoglobin    |
| HBA1       | Hemoglobin    |
| PRDX2      | Redox         |
| GAPDH      | Enzyme        |
| SELENBP1   | Structure/ECM |
| PRDX6      | Redox         |
| PRDX1      | Redox         |
| SAA1       | Structure/ECM |
| ANXA5      | Structure/ECM |
| SERPINC1   | Coag/Comp     |
| VIM        | Structure/ECM |
| SERPINE1   | Coag/Comp     |
| APOB       | Structure/ECM |
| C3         | Coag/Comp     |
| ITIH1      | Coag/Comp     |
| ITIH2      | Coag/Comp     |
| GSN        | Redox         |
| FN1        | Coag/Comp     |
| CXCL7      | Coag/Comp     |
| THBS1      | Structure/ECM |
| PLF4       | Coag/Comp     |
| SRGN       | Coag/Comp     |
| TIMP1      | Structure/ECM |
| TIMP9      | Structure/ECM |
